# Supplementary material for: A rapid and affordable point-of-care test for detection of SARS-CoV-2-specific antibodies based on hemagglutination and Artificial Intelligence-based image interpretation
Source: Res Sq. 2021 Jul 20:rs.3.rs-712902. Preprint. [Version 1] doi: 10.21203/rs.3.rs-712902/v1 (PMC8312898; doi:10.21203/rs.3.rs-712902/v1)
Supplement: Supplement 2 [file 04a027f739802282bc89f21c.xlsx]

## Sheet: Sheet1
								COV2G Siemens 1st Gen Pos >= 1.0		EUROIMMUN EIA Equiv 0.8 - 1.0; Pos >= 1.1		Abbott Pos >= 1.4		S-Flow	AI							Comment
	Donor ID#	Gender	Age	Infected	Vaccination	Date of first dose	Date of second dose	COV2G Siemens 1st Gen	Result	EUROIMMUN EIA	Result	Abbott	Result	Result	Result	AI Neg. Control (bin)	AI Neg. Control confidence (score)	AI Sample (bin)	AI Sample confidence (score)	AI Pos.Control (bin)	AI Pos. Control confidence (score)
GROUP 1 Not infected, not vaccinated	NANO_03	F	26					0	Negative	0.144	Negative	0.4	Negative		Positive	1	0.6269	3	0.5047	5	0.8557	invalid due to insufficient image focus
	NANO_14	M	24					0	Negative	0.164	Negative	0.01	Negative	Negative	Negative	1	0.7672	1	0.8112	5	0.774
	NANO_19	F	35					0.01	Negative	0.219	Negative	0.06	Negative	Negative	Negative	1	0.8638	1	0.873	5	0.795
	NANO_22	F	53					0.02	Negative	0.405	Negative	0.03	Negative		Negative	2	0.6419	1	0.6554	6	0.6128
	NANO_25	F	31					0	Negative	0.234	Negative	0.02	Negative	Negative	Equivocal	0	0.771	1	0.7934	5	0.8459
	NANO_26	F	22					0	Negative	0.142	Negative	0.02	Negative		Negative	1	0.6735	1	0.8589	5	0.9192
	NANO_31	F	29					0	Negative	0.109	Negative	0.01	Negative		Negative	1	0.8251	1	0.9116	5	0.9094
	NANO_33	M	39					0.02	Negative	0.135	Negative	0.09	Negative	Negative	Negative	0	0.8865	0	0.9558	5	0.9181
	NANO_36	F	51					0	Negative	0.158	Negative	0.05	Negative		Negative	1	0.6092	1	0.8573	6	0.6046
	NANO_38	F	24					0.05	Negative	0.255	Negative	0.18	Negative		Negative	1	0.8106	1	0.9233	5	0.9399
	NANO_40	F	24					0	Negative	0.315	Negative	0.03	Negative		Negative	1	0.7125	1	0.7943	5	0.9502
	NANO_41	F	23					0.01	Negative	0.104	Negative	0.02	Negative		Negative	3	0.5734	2	0.6203	5	0.5239
	NANO_43	F	40					0	Negative	0.103	Negative	0.02	Negative	Negative	Negative	0	0.676	0	0.8359	5	0.9448
	NANO_44	F	23					0	Negative	0.38	Negative	0.22	Negative	Negative	Negative	1	0.3633	1	0.8765	5	0.9255	Invalid due to low confidence score
	NANO_55	F	27					0	Negative	0.157	Negative	0.01	Negative		Negative	1	0.5184	1	0.7126	5	0.9361
GROUP 2 Not infected, vaccinated	NANO_01	M	35		Moderna	2021-01-09	2021-02-06	> 20.00	Positive	8.095	Positive	0.06	Negative		Positive	1	0.7061	5	0.8373	6	0.5962
	NANO_02	M	56		Moderna	2021-02-05	2021-03-05	> 20.00	Positive	6.882	Positive	0.05	Negative		Positive	1	0.8691	5	0.8743	6	0.5729
	NANO_04	F	27		Moderna	2021-01-15	2021-02-12	> 20.00	Positive	8.097	Positive	0.02	Negative		Positive	1	0.9092	7	0.6744	7	0.7629
	NANO_05	M	71		Moderna	2021-02-12	2021-03-12	> 20.00	Positive	8.097	Positive	0.01	Negative		Positive	1	0.828	5	0.8822	5	0.9349
	NANO_06	M	57		Moderna	2021-01-21	2021-02-21	> 20.00	Positive	8.041	Positive	0.02	Negative	Positive	Positive	0	0.7203	5	0.8989	7	0.568
	NANO_11	M	60		Moderna	2021-01-10	2021-02-05	> 20.00	Positive	8.023	Positive	0.02	Negative		Positive	0	0.9348	5	0.8731	6	0.5794
	NANO_16	M	34		Moderna	2021-01-22	2021-02-19	> 20.00	Positive	8.095	Positive	0.07	Negative		Positive	1	0.8875	5	0.9076	7	0.6629
	NANO_17	F	59		Moderna	January 2021	February 2021	> 20.00	Positive	8.095	Positive	0.05	Negative		Positive	1	0.7117	6	0.5567	6	0.6156
	NANO_20	M	61		Moderna	2021-01-22	2021-02-19	> 20.00	Positive	8.032	Positive	0.01	Negative		Positive	0	0.9058	5	0.8918	6	0.6955
	NANO_28	F	58		Moderna	2021-01-09	2021-02-06	> 20.00	Positive	8.087	Positive	0.02	Negative		Positive	1	0.8899	5	0.5396	7	0.7612
	NANO_32	M	47		Moderna	2021-01-09	2021-02-06	> 20.00	Positive	8.094	Positive	0.02	Negative		Positive	0	0.9485	5	0.8799	5	0.94
	NANO_37	F	52		Moderna	2021-02-01	2021-02-21	> 20.00	Positive	8.096	Positive	0.07	Negative	Positive	Positive	0	0.8949	7	0.6331	7	0.681
	NANO_47	F	46		Moderna	2021-01-31	2021-02-08	> 20.00	Positive	8.097	Positive	0.01	Negative		Positive	1	0.8673	5	0.8937	5	0.9238
	NANO_49	F	34		Moderna	January 2021	February 2021	> 20.00	Positive	8.096	Positive	0.04	Negative		Positive	1	0.84	5	0.7848	5	0.8652
	NANO_50	M	23		Moderna	2021-01-13	2021-02-11	> 20.00	Positive	8.095	Positive	0.02	Negative		Positive	0	0.7539	3	0.5697	5	0.7717
	NANO_52	M	40		Moderna	2021-01-08	2021-02-05	> 20.00	Positive	8.094	Positive	0.01	Negative		Positive	1	0.6728	6	0.5538	6	0.5808
	NANO_53	F	24		Moderna	2021-01-14	2021-02-11	> 20.00	Positive	8.093	Positive	0.03	Negative		Positive	1	0.8947	5	0.8275	6	0.5307
	NANO_56	M	37		Moderna	2021-01-13	2021-02-12	> 20.00	Positive	8.095	Positive	0.18	Negative		Positive	1	0.7867	5	0.888	5	0.9232
GROUP 3 Infected, not vaccinated	NANO_09	F	22	X				0.32	Negative	0.927	Equivocal	0.15	Negative	Positive	Equivocal	1	0.8928	2	0.7651	6	0.5632
	NANO_13	M	27	X				0.28	Negative	0.902	Equivocal	0.16	Negative	Positive	Positive	1	0.8101	3	0.9155	6	0.5904
	NANO_15	F	32	X				3.21	Positive	1.947	Positive	0.55	Negative	Positive	Positive	2	0.693	5	0.6282	7	0.6491
	NANO_23	F	30	X				0.47	Negative	1.14	Positive	3.47	Positive	Positive	Positive	0	0.8205	5	0.8207	6	0.615
	NANO_24	F	44	X				8.14	Positive	4.907	Positive	6.53	Positive	Positive	Positive	0	0.9119	5	0.8895	6	0.5953
	NANO_27	M	27	X				2.43	Positive	3.042	Positive	5.04	Positive	Positive	Positive	0	0.8661	3	0.6426	7	0.6954
	NANO_30	F	49	X				4.59	Positive	3.944	Positive	5.58	Positive	Positive	Positive	0	0.9259	5	0.9215	5	0.9529
	NANO_34	F	25	X				6.41	Positive	4.424	Positive	7.01	Positive	Positive	Positive	1	0.9161	5	0.8992	6	0.5862
	NANO_35	M	30	X				0.29	Negative	1.086	Equivocal	0.5	Negative	Positive	Equivocal	0	0.9282	1	0.7128	7	0.6395
	NANO_39	F	31	X				3.98	Positive	4.339	Positive	7.29	Positive	Positive	Positive	1	0.8348	6	0.5641	2	0.2902	Invalid due to low confidence score
	NANO_45	F	22	X				0.77	Negative	1.252	Positive	0.22	Negative	Positive	Positive	0	0.6965	3	0.8575	6	0.5825
	NANO_46	F	45	X				2.11	Positive	2.17	Positive	1.24	Negative	Positive	Positive	1	0.8449	3	0.8957	5	0.6464
	NANO_48	F	41	X				0.23	Negative	0.721	Negative	2.55	Positive	Positive	Positive	0	0.8911	2	0.6689	6	0.5897
	NANO_54	F	33	X				0.55	Negative	1.34	Positive	0.63	Negative	Positive	Equivocal	1	0.8136	2	0.6177	6	0.5527
	NANO_57	M	29	X				0.47	Negative	1.33	Positive	0.2	Negative	Positive	Positive	1	0.9119	3	0.7437	6	0.5883
GROUP 4 Infected, vaccinated	NANO_07	F	67	X	Pfizer-BioNTech	2021-02-02	2021-02-23	> 20.00	Positive	8.096	Positive	6.94	Positive		Positive	1	0.8511	7	0.5181	6	0.6543
	NANO_08	F	29	X	Moderna	2021-01-19	2021-02-20	> 20.00	Positive	8.096	Positive	0.91	Negative		Positive	0	0.8667	6	0.5908	7	0.8046
	NANO_10	M	21	X	Pfizer-BioNTech	2021-01-26	2021-02-20	> 20.00	Positive	8.093	Positive	1.07	Negative		Positive	1	0.8953	5	0.8738	6	0.5857
	NANO_12	F	34	X	Moderna	2021-01-22	2021-02-19	> 20.00	Positive	8.094	Positive	0.72	Negative		Equivocal	3	0.6065	4	0.5576	5	0.5842
	NANO_18	M	39	X	Moderna	2021-01-15	2021-02-12	> 20.00	Positive	7.832	Positive	0.56	Negative		Positive	0	0.8592	5	0.7601	5	0.7988
	NANO_21	F	31	X	Moderna	2021-01-22	2021-02-12	> 20.00	Positive	8.094	Positive	0.15	Negative	Positive	Positive	0	0.913	7	0.6091	7	0.6362
	NANO_29	F	50	X	Moderna	2021-01-07	2021-02-04	> 20.00	Positive	8.095	Positive	2.5	Positive		Positive	1	0.9078	5	0.7721	5	0.7852
	NANO_42	M	28	X	Moderna	2021-01-21	2021-02-21	> 20.00	Positive	8.094	Positive	0.5	Negative		Positive	0	0.7295	5	0.8272	5	0.9276
	NANO_51	F	48	X	Moderna	2021-01-07	2021-02-04	> 20.00	Positive	8.095	Positive	0.51	Negative		Positive	1	0.6565	7	0.6272	7	0.8316
	NANO_58	F	24	X	Moderna	2021-01-15	2021-02-11	> 20.00	Positive	8.087	Positive	4.94	Positive		Positive	1	0.834	7	0.7376	7	0.8548
