# Supplementary material for: A rapid and affordable point-of-care test for detection of SARS-CoV-2-specific antibodies based on hemagglutination and Artificial Intelligence-based image interpretation
Source: Res Sq. 2021 Jul 20:rs.3.rs-712902. Preprint. [Version 1] doi: 10.21203/rs.3.rs-712902/v1 (PMC8312898; doi:10.21203/rs.3.rs-712902/v1)
Supplement: Supplement 4 [file bc1747ee3b1651a7911a21f7.xlsx]

## Sheet: Sheet1
	Training	Validation	Holdout Test
Agglutination 0	1050	117	102
Agglutination 1	153	18	19
Agglutination 2	109	13	12
Agglutination 3	171	20	15
Agglutination 4	75	9	14
Agglutination 5	67	8	13
Agglutination 6	184	21	19
Agglutination 7	204	23	18
Agglutination 8	227	26	10
Agglutination 9	86	10	15
Total	2326	265	237
